# Supplementary material for: Ampelopsin Confers Endurance and Rehabilitation Mechanisms in Glycine max cv. Sowonkong under Multiple Abiotic Stresses
Source: MDPI journal article supplement (doi:10.3390/ijms222010943), 2021-10-10
Supplement: s1 [file s1]

## **Supplementary materials**

### **Ampelopsin confers endurance and rehabilitation mechanisms in *Glycine max* cv. Sowonkong under multiple abiotic stresses**

Elham Ahmed Kazerooni<sup>1\*</sup>, Abdullah Mohammed Al-Sadi<sup>2</sup>, Il-Doo Kim<sup>1</sup>, Muhammad Imran<sup>1</sup>, In-Jung Lee<sup>1\*</sup>

<sup>1</sup>Department of Applied Biosciences, Kyungpook National University, Daegu 41566, Republic of Korea

<sup>2</sup>Department of Plant Sciences, College of Agricultural and Marine Sciences, Sultan Qaboos University, PO Box 34, Al-Khod 123, Oman

#### **\*Corresponding authors**

Prof. In-Jung lee  
Dr. Elham Ahmed Kazerooni  
Crop Physiology Laboratory  
Department of Applied Biosciences  
Kyungpook National University  
Daegu 41566, Republic of Korea  
E-mail: [ijlee@knu.ac.kr](mailto:ijlee@knu.ac.kr)  
E-mail: [elham.ghasemi.k@gmail.com](mailto:elham.ghasemi.k@gmail.com)  
Tel: +82-53-950-5708(Office)

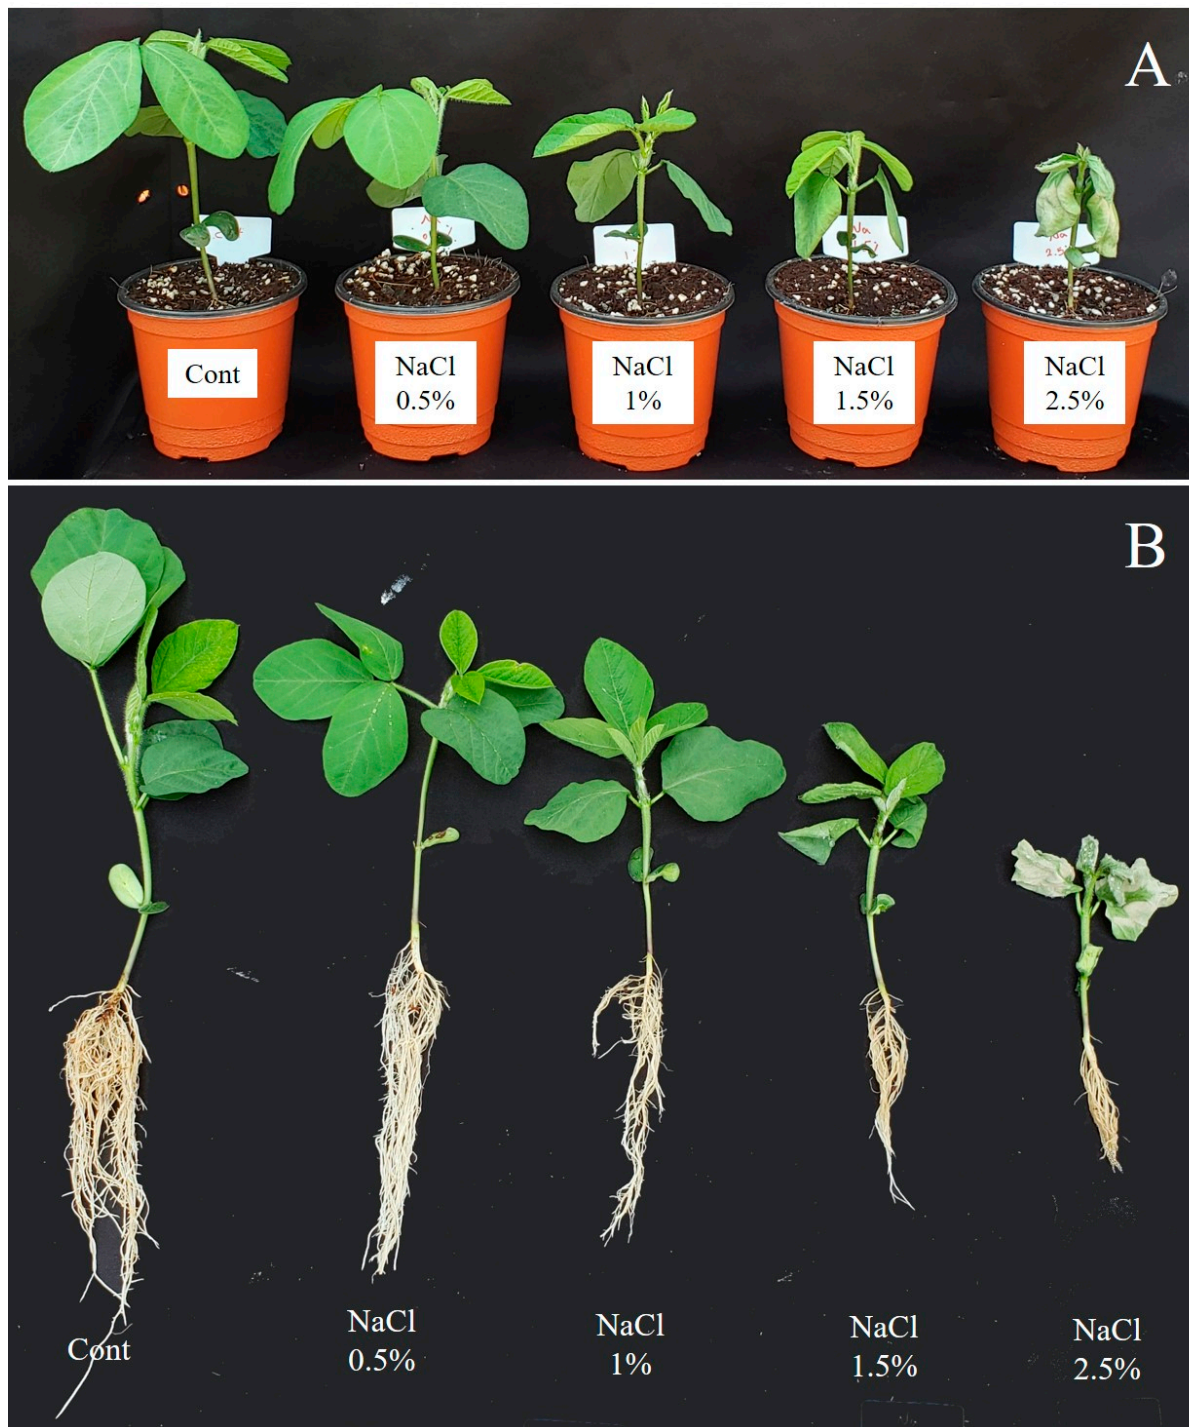

**Figure S1.** Effects of various salt (NaCl) concentrations on the growth of soybean seedlings following 7 days of treatment (7DAT; A and B). Treatments: Cont (control), 0.5% NaCl, 1% NaCl, 1.5% NaCl, and 2.5% NaCl.

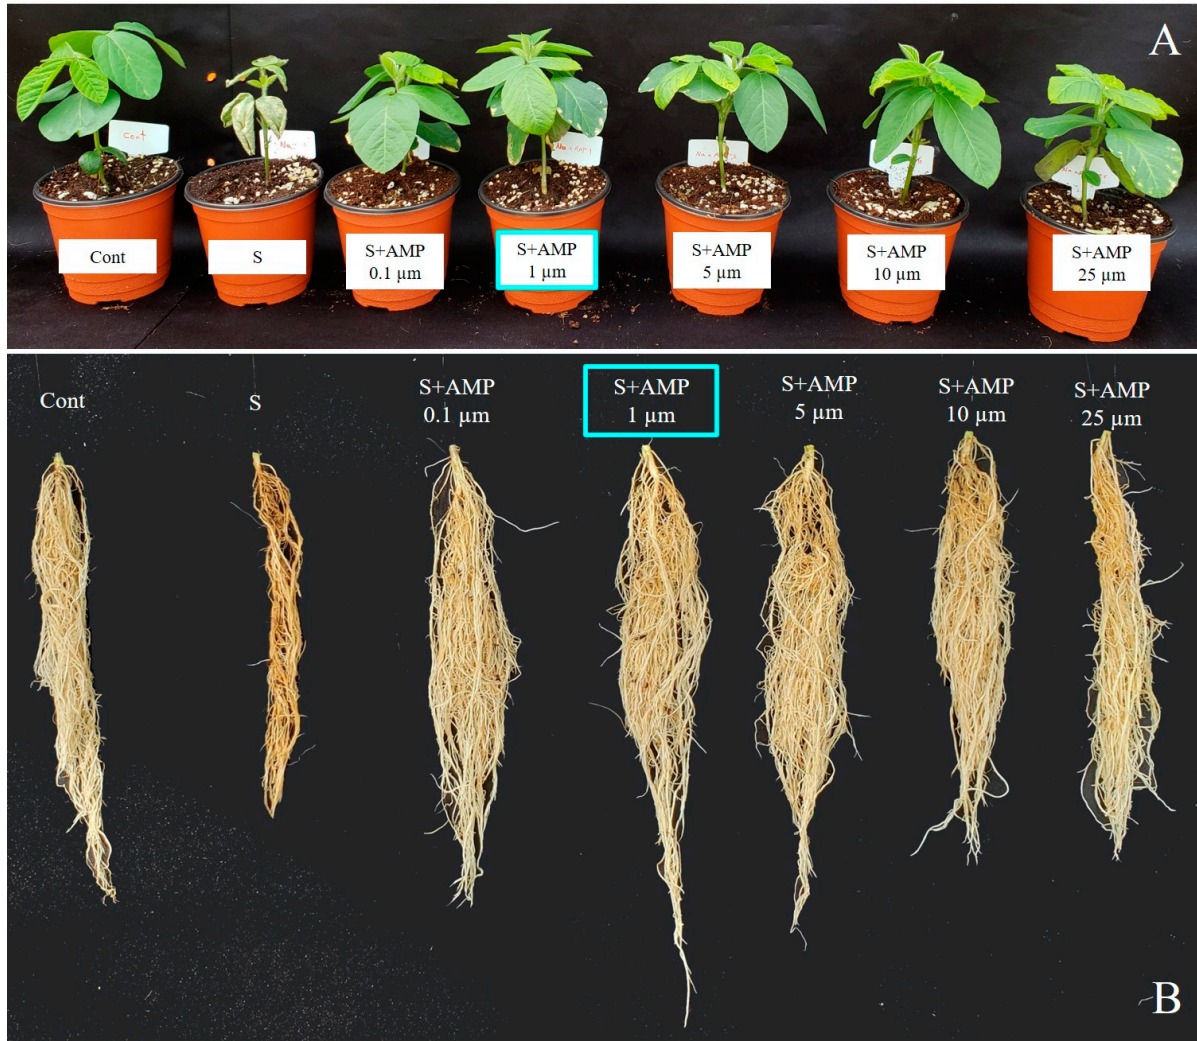

**Figure S2.** Effects of various ampelopsin concentrations on the growth of stressed-soybean seedlings following 7 days of sodium chloride treatment (7DAT; A and B). Treatments: Cont (control), 1.5% NaCl (sodium chloride), 0.1  $\mu$ M AMP (ampelopsin) + 1.5% NaCl (sodium chloride), 1  $\mu$ M AMP (ampelopsin) + 1.5% NaCl (sodium chloride), 5  $\mu$ M AMP (ampelopsin) + 1.5% NaCl (sodium chloride), 10  $\mu$ M AMP (ampelopsin) + 1.5% NaCl (sodium chloride), and 25  $\mu$ M AMP (ampelopsin) + 1.5% NaCl (sodium chloride).



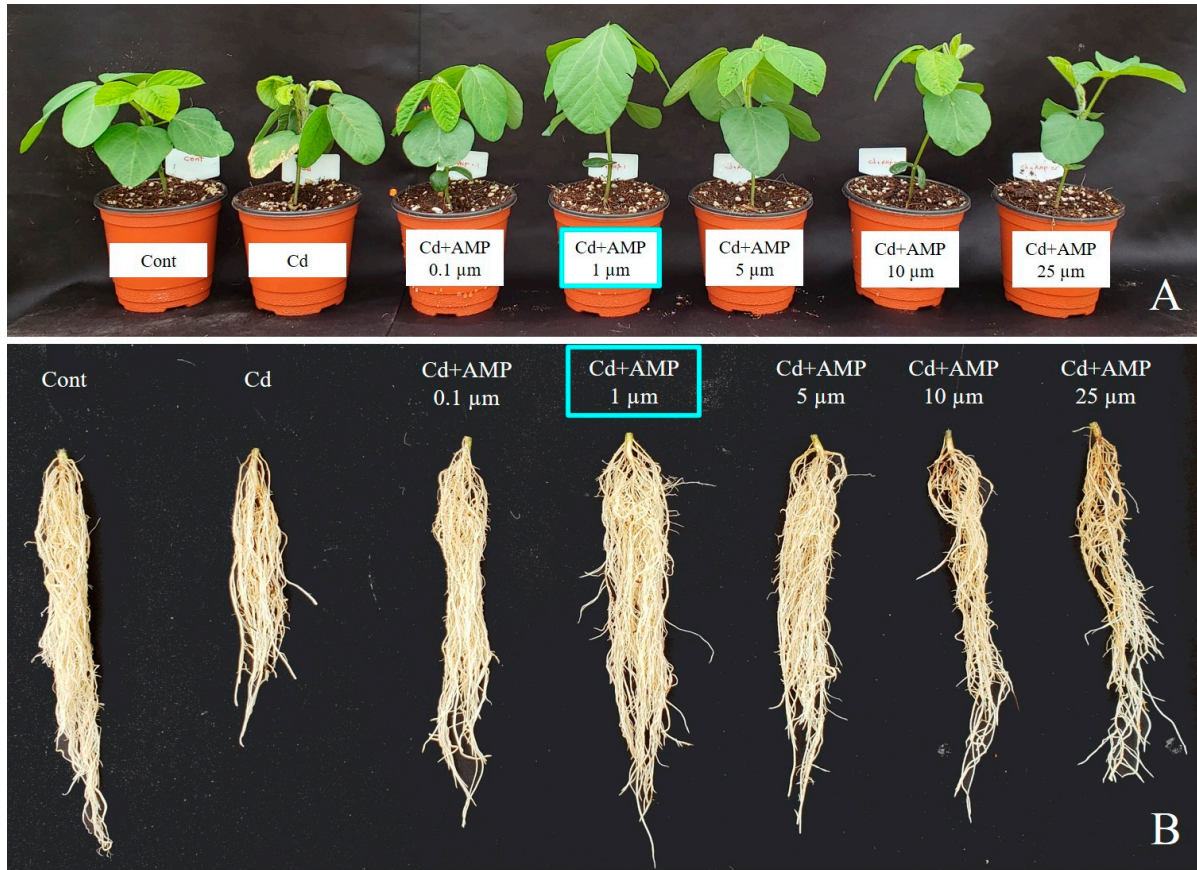

**Figure S3.** Effects of various ampelopsin concentrations on the growth of soybean seedlings following 7 days of cadmium treatment (7DAT; A and B). Treatments: Cont (control), 3mM Cd (cadmium), 0.1  $\mu\text{M}$  AMP (ampelopsin) + 3mM Cd (cadmium), 1  $\mu\text{M}$  AMP (ampelopsin) + 3mM Cd (cadmium), 5  $\mu\text{M}$  AMP (ampelopsin) + 3mM Cd (cadmium), 10  $\mu\text{M}$  AMP (ampelopsin) + 3mM Cd (cadmium), and 25  $\mu\text{M}$  AMP (ampelopsin) + 3mM Cd (cadmium).

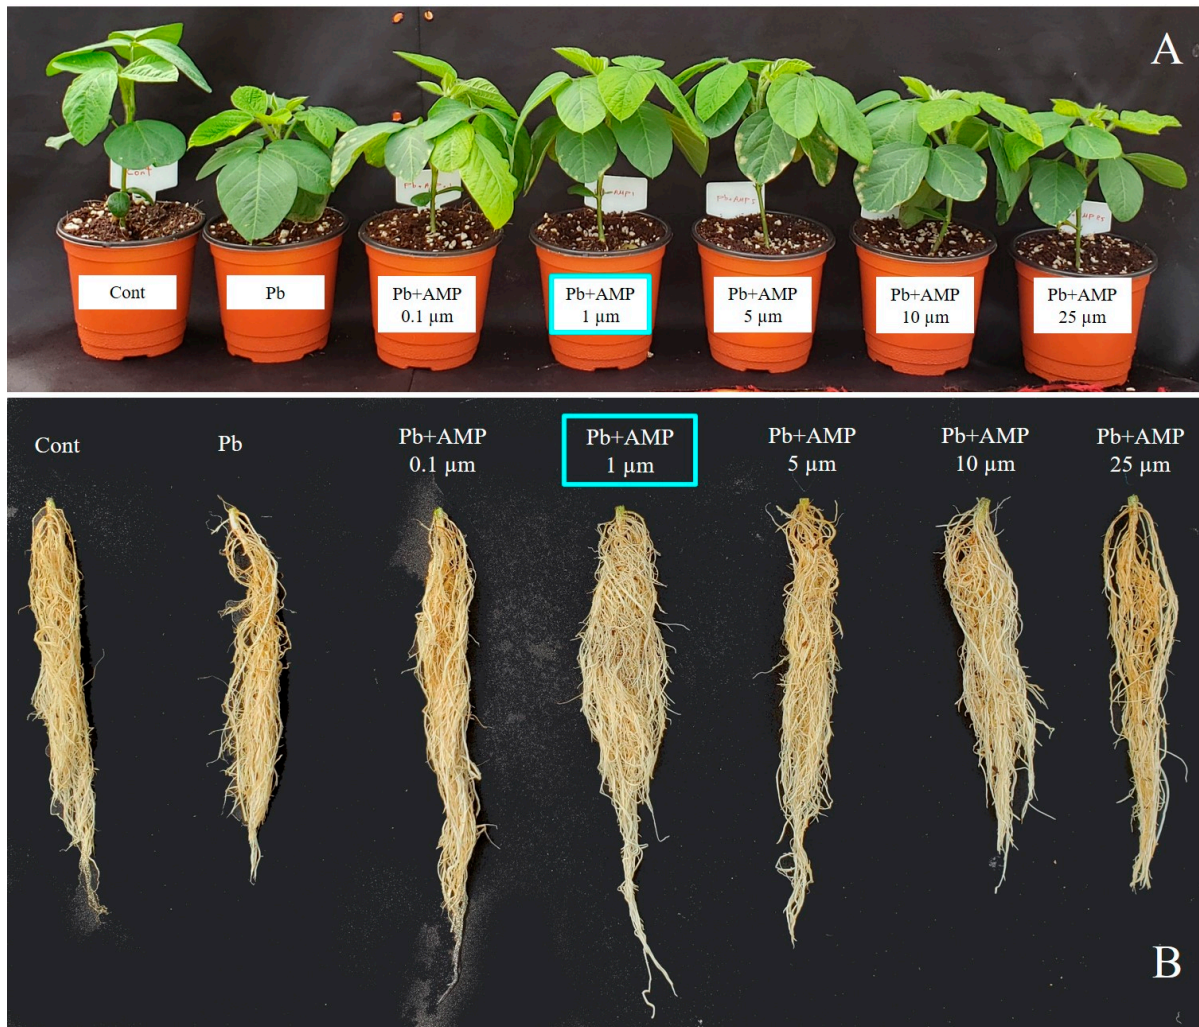

**Figure S4.** Effects of various ampelopsin concentrations on the growth of soybean seedlings following 7 days of lead treatment (7DAT; A and B). Treatments: Cont (control), 3mM Pb (lead), 0.1  $\mu\text{M}$  AMP (ampelopsin) + 3mM Pb (lead), 1  $\mu\text{M}$  AMP (ampelopsin) + 3mM Pb (lead), 5  $\mu\text{M}$  AMP (ampelopsin) + 3mM Pb (lead), 10  $\mu\text{M}$  AMP (ampelopsin) + 3mM Pb (lead), and 25  $\mu\text{M}$  AMP (ampelopsin) + 3mM Pb (lead).



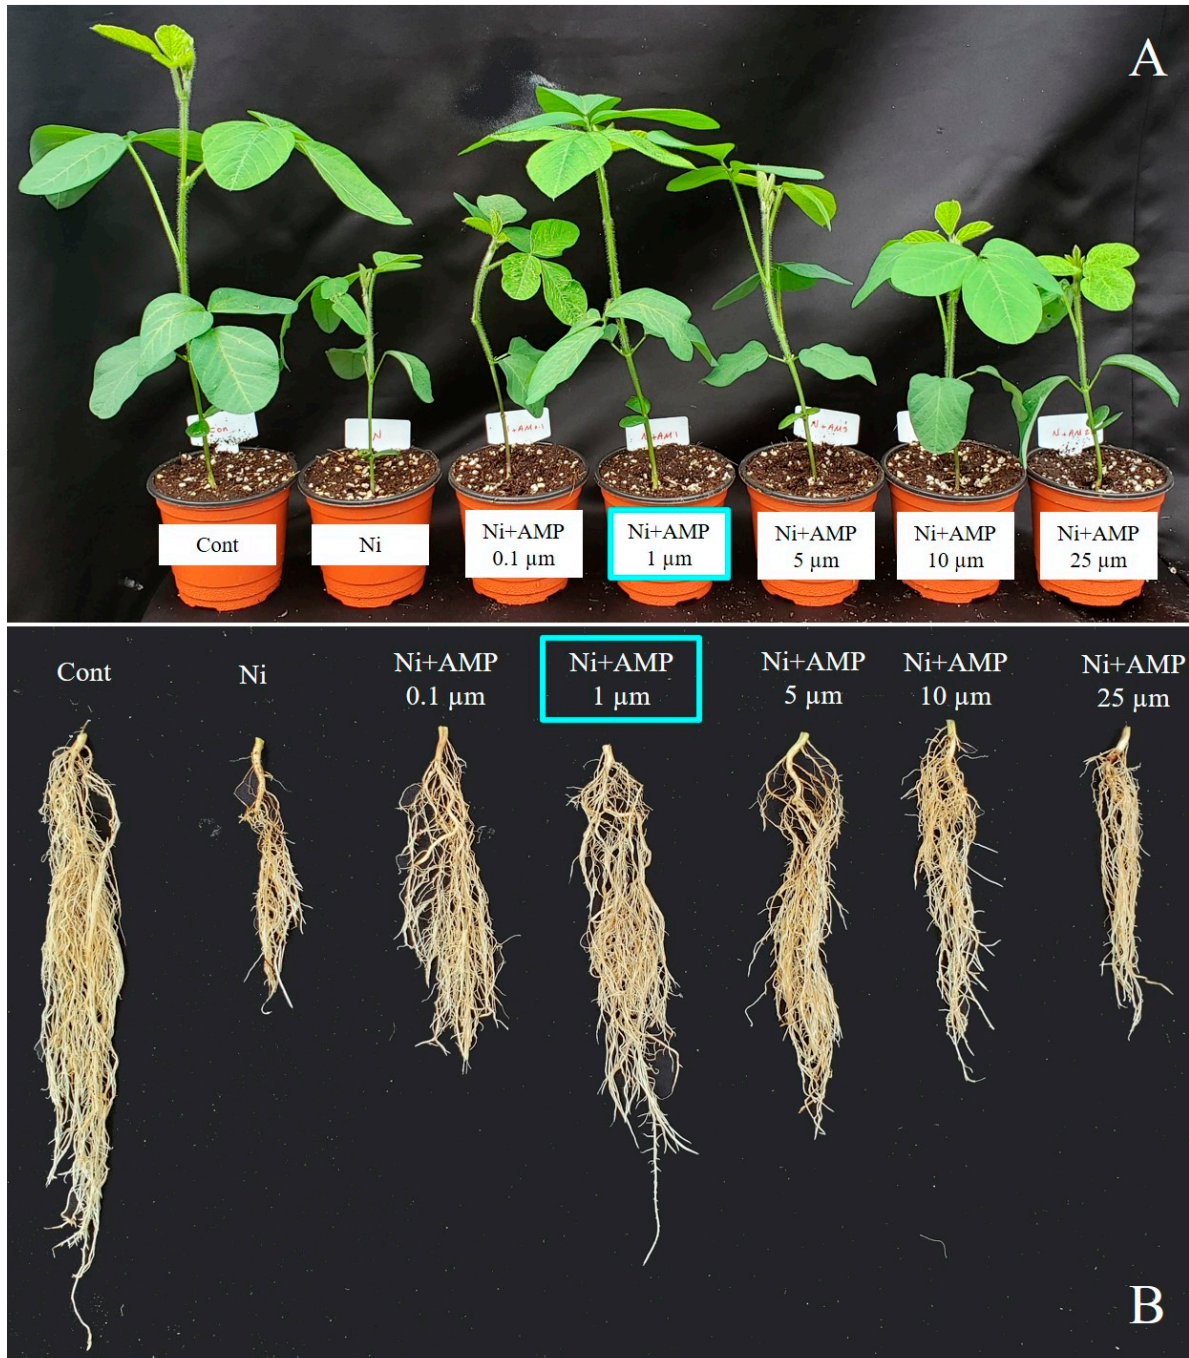

**Figure S5.** Effects of various ampelopsin concentrations on the growth of soybean seedlings following 12 days of nickel treatment (12DAT; A and B). Treatments: Cont (control), 3mM Ni (nickel), 0.1  $\mu\text{M}$  AMP (ampelopsin) + 3mM Ni (nickel), 1  $\mu\text{M}$  AMP (ampelopsin) + 3mM Ni (nickel), 5  $\mu\text{M}$  AMP (ampelopsin) + 3mM Ni (nickel), 10  $\mu\text{M}$  AMP (ampelopsin) + 3mM Ni (nickel), and 25  $\mu\text{M}$  AMP (ampelopsin) + 3mM Ni (nickel).

**Table S1.** Physiochemical properties of soil samples during 12 days of treatment (12DAT).

| Sample name | Soil texture | pH         | EC<br>(mS) | Moisture<br>(%) |
|-------------|--------------|------------|------------|-----------------|
| 12DAT       |              |            |            |                 |
| Cont        | sandy loam   | 7.15±0.05b | 0.33±0.01j | 70.7±0.1g       |
| AMP         | sandy loam   | 8.17±0.03a | 0.59±0.01i | 77.73±0.07f     |
| S           | sandy loam   | 6.5±0.05e  | 11.81±0.8a | 100.0±0.0a      |
| S+AMP       | sandy loam   | 7.05±0.05c | 6.34±0.01b | 94.7±0.3e       |
| Cd          | sandy loam   | 5.05±0.05i | 5.75±0.01c | 100.0±0.0a      |
| Cd+AMP      | sandy loam   | 6.05±0.05f | 2.53±0.03f | 97.8±0.2b       |
| Pb          | sandy loam   | 5.6±0.1g   | 5.63±0.08  | 100.0±0.0a      |
| Pb+AMP      | sandy loam   | 6.95±0.05d | 2.24±0.02h | 95.1±0.1d       |
| Ni          | sandy loam   | 5.4±0.1h   | 5.65±0.08  | 100.0±0.0a      |
| Ni+AMP      | sandy loam   | 6.05±0.05f | 2.33±0.03g | 96.8±0.2c       |

Values show the means ± SE (n = 5) and significant differences at  $p < 0.05$  (LSD test). Data within the same column followed by different lowercase letters are significantly different.

**Table S2.** Primers used for relative gene expression analysis.

| Gene symbol | Primers (5'–3') Forward/reverse                                        |
|-------------|------------------------------------------------------------------------|
| GmNAC109    | 5'-CACCATGGCCACTACAACACAAC-3'<br>5'-TTAATTGCAGAAGGACTTGGAGA-3'         |
| GmWRKY12    | 5'-CAATACTGCTGTGGCCGCTA-3'<br>5'-ATCCAGTGTTTCGCACCTGTT-3'              |
| GmWRKY142   | 5'-TTATGGACAAAGGATGGGTT-3'<br>5'-GCCCTTGTCTATTTACTCCC-3'               |
| GmERF75     | 5'-ATGGCGAACGCAGCTGAAGTTT-3'<br>5'-TCACACCGCCACGAGCG-3'                |
| GmFAD3      | 5'-AAAACGCCTATGGTTAAAGACACAAAG-3'<br>5'-AAAAGGCCTGTGTCGTTGCGAGTGGAG-3' |
| GmSAP16     | 5'-CGATTTTCTTCCTTTCACC-3'<br>5'-GCTTCGCAAACAACAACCT-3'                 |
| GmFDL19     | 5'-GGTTTGGAGAGATATGCAAC-3'<br>5'-GGCATGTTGTGATGTGTTGT-3'               |
| GmAPX       | 5'-ATCCTTGCTACGCACACACT-3'<br>5'-TCCACATGCTTGGTCCACA-3'                |
| Actin       | 5'-TTGACTGAGCGTGGTTATTCC-3'<br>5'-GATCTTCATGCTGCTGGGTG-3'              |



**Table S3.** Effects of various salt (NaCl) concentrations on the growth of soybean seedlings. Data were calculated after 7 days of treatment (7DAT).

| Treatment      | Plant height<br>(cm) | Root length<br>(cm) | Stem diameter<br>(cm) | Leaf length<br>(cm) | Leaf width<br>(cm) | Chl<br>(Spad) | Plant fresh weight<br>(g) | Plant dry weight<br>(g) | Root fresh weight<br>(g) | Root dry weight<br>(g) | No. leaf   |
|----------------|----------------------|---------------------|-----------------------|---------------------|--------------------|---------------|---------------------------|-------------------------|--------------------------|------------------------|------------|
| 7DAT           |                      |                     |                       |                     |                    |               |                           |                         |                          |                        |            |
| Cont           | 15.83±0.6a           | 21±0.58a            | 0.32±0.02a            | 7.67±0.28a          | 5.82±0.41a         | 48±0.46a      | 5.07±0.33a                | 0.54±0.01a              | 2.11±0.03a               | 0.15±0.01a             | 13±0.0a    |
| NaCl<br>(0.5%) | 12.7±0.15b           | 15.5±0.29b          | 0.21±0.0b             | 5.79±0.03b          | 4.03±0.01b         | 31.77±0.38b   | 2.94±0.08b                | 0.36±0.01b              | 1.45±0.08b               | 0.09±0.01b             | 11±0.0b    |
| NaCl<br>(1%)   | 9.33±0.33c           | 13.5±0.29c          | 0.2±0.0c              | 4.92±0.19c          | 3.07±0.06c         | 29.37±0.52c   | 2.37±0.08c                | 0.3±0.01c               | 0.7±0.01c                | 0.03±0.0c              | 10±0.0c    |
| NaCl<br>(1.5%) | 7.33±0.33d           | 9.83±0.6d           | 0.19±0.0d             | 3.71±0.12d          | 2.35±0.09d         | 21.33±0.88d   | 1.68±0.04d                | 0.25±0.01d              | 0.54±0.01d               | 0.02±0.0d              | 8.33±0.33d |
| NaCl<br>(2.5%) | 6.33±0.33e           | 5.9±0.31e           | 0.16±0.0e             | 2.2±0.06e           | 1.17±0.05e         | 10.77±0.34e   | 1.19±0.01e                | 0.24±0.01e              | 0.43±0.02e               | 0.01±0.0e              | 5.33±0.33e |

Treatments: Cont (control), 0.5% NaCl, 1% NaCl, 1.5% NaCl, and 2.5% NaCl. Values show the means ± SE (n = 5) and significant differences at  $p < 0.05$  (LSD test). Data within the same column followed by different lowercase letters are significantly different.

**Table S4.** Effects of various ampelopsin (AMP) concentrations on the growth of salinity (1.5% NaCl) and heavy metal (3mM Cd, Pb, and Ni) stressed soybean seedlings. Data were calculated after 7 days of treatment (7DAT).

| Treatment       | Plant height<br>(cm) | Root length<br>(cm) | Stem<br>diameter<br>(cm) | Leaf<br>length<br>(cm) | Leaf width<br>(cm) | Chl<br>(Spad) |
|-----------------|----------------------|---------------------|--------------------------|------------------------|--------------------|---------------|
| 7DAT            |                      |                     |                          |                        |                    |               |
| Cont            | 10.25±0.25d          | 20.5±0.5c           | 0.23±0.0a                | 6.24±0.0c              | 4.06±0.01d         | 32.55±0.55f   |
| S               | 7.5±0.5g             | 13.5±0.5g           | 0.17±0.0f                | 3.11±0.0g              | 2.93±0.04g         | 25.85±0.25g   |
| S+AMP (0.1 µm)  | 10.5±0.5c            | 19.7±0.2d           | 0.18±0.0e                | 5.95±0.0d              | 4.56±0.0c          | 33.9±0.1e     |
| S+AMP (1 µm)    | 13.5±0.5a            | 23.75±0.25a         | 0.22±0.0b                | 6.72±0.0a              | 4.67±0.0a          | 42.6±0.4a     |
| S+AMP (5 µm)    | 11.5±0.5b            | 20.75±0.25b         | 0.20±0.0c                | 6.37±0.0b              | 4.63±0.02b         | 38.5±0.5b     |
| S+AMP (10 µm)   | 9.5±0.5e             | 19.25±0.25e         | 0.19±0.0d                | 5.79±0.0e              | 3.91±0.0e          | 37.75±0.15c   |
| S+AMP (25 µm)   | 8.5±0.5f             | 18.5±0.5f           | 0.18±0.0e                | 5.28±0.0f              | 3.90±0.0f          | 37.55±0.55d   |
| Cont            | 10.25±0.25e          | 20.5±0.5c           | 0.23±0.0a                | 6.24±0.0b              | 4.06±0.01d         | 32.55±0.55c   |
| Cd              | 8.5±0.5f             | 14±1.0g             | 0.18±0.02e               | 4.03±0.01g             | 2.91±0.0g          | 20.0±0.4g     |
| Cd+AMP (0.1 µm) | 10.75±0.25d          | 21.0±0.5b           | 0.19±0.0d                | 6.07±0.0d              | 4.25±0.05c         | 32.8±0.2b     |
| Cd+AMP (1 µm)   | 14.75±0.75a          | 24.25±0.75a         | 0.23±0.0a                | 8.82±0.02a             | 6.5±0.0a           | 42.35±0.65a   |
| Cd+AMP (5 µm)   | 12.25±0.25b          | 20.25±0.25d         | 0.21±0.0b                | 6.17±0.0c              | 4.58±0.0b          | 30.7±0.3d     |
| Cd+AMP (10 µm)  | 12.0±0.0c            | 19.25±0.25e         | 0.20±0.0c                | 5.03±0.0e              | 3.26±0.0e          | 28.95±0.05e   |
| Cd+AMP (25 µm)  | 10.75±0.25d          | 18.75±0.25f         | 0.20±0.0c                | 4.78±0.0f              | 2.97±0.0f          | 25.7±0.3f     |
| Cont            | 10.25±0.25f          | 20.5±0.5a           | 0.23±0.0a                | 6.24±0.0c              | 4.06±0.01c         | 32.55±0.55a   |
| Pb              | 7.5±0.5g             | 12.75±0.75g         | 0.18±0.0e                | 5.43±0.0f              | 3.30±0.02f         | 23.5±0.5g     |
| Pb+AMP (0.1 µm) | 11.25±0.25c          | 17.75±0.75e         | 0.19±0.0d                | 6.85±0.0b              | 4.56±0.0b          | 29.5±0.2c     |
| Pb+AMP (1 µm)   | 14.5±0.5a            | 20.0±1.0b           | 0.22±0.0b                | 7.48±0.01a             | 5.08±0.0a          | 31.9±1.1b     |
| Pb+AMP (5 µm)   | 12.5±0.5b            | 19.75±0.25c         | 0.20±0.0c                | 5.66±0.0d              | 3.48±0.0d          | 28.7±0.3d     |
| Pb+AMP (10 µm)  | 11.0±0.0d            | 18.25±0.25d         | 0.19±0.0d                | 5.48±0.0e              | 3.40±0.0e          | 27.8±0.2e     |
| Pb+AMP (25 µm)  | 10.5±0.0e            | 17.25±0.25f         | 0.19±0.0d                | 4.39±0.0g              | 3.16±0.0g          | 25.15±0.85f   |
| Cont            | 10.25±0.25f          | 20.5±0.5b           | 0.23±0.0b                | 6.24±0.0c              | 4.06±0.01c         | 32.55±0.55b   |
| Ni              | 9.1±0.72g            | 10.5±0.5g           | 0.19±0.01f               | 4.57±0.17f             | 2.60±0.15g         | 22.4±1.54g    |
| Ni+AMP (0.1 µm) | 11.3±0.33e           | 14.66±0.33e         | 0.21±0.0d                | 5.08±0.01e             | 3.67±0.02d         | 28.8±0.2d     |
| Ni+AMP (1 µm)   | 14.33±0.33a          | 21.33±0.88a         | 0.24±0.0a                | 7.54±0.37a             | 4.81±0.14a         | 36.8±1.8a     |
| Ni+AMP (5 µm)   | 13.33±0.33b          | 16.83±0.44c         | 0.23±0.0b                | 6.64±0.02b             | 4.75±0.01b         | 31.96±0.03c   |
| Ni+AMP (10 µm)  | 12.33±0.33c          | 15.5±0.28d          | 0.22±0.0c                | 5.43±0.03d             | 3.53±0.03e         | 27.5±0.5e     |
| Ni+AMP (25 µm)  | 11.33±0.33d          | 13.66±0.33f         | 0.20±0.0e                | 4.50±0.0g              | 3.17±0.02f         | 24.2±0.41f    |

Values show the means ± SE (n = 5) and significant differences at p < 0.05 (LSD test). Data within the same column followed by different lowercase letters are significantly different.
